# Supplementary material for: Ancestral protein resurrection and engineering opportunities of the mamba aminergic toxins
Source: PubMed Central journal article supplement (PMC5457417; doi:10.1038/s41598-017-02953-0), 2017-06-02
Supplement: 41598_2017_2953_MOESM1_ESM.pdf [file 41598_2017_2953_MOESM1_ESM.pdf]

*Supplemental Information for:*

**Ancestral protein resurrection and engineering opportunities of the mamba aminergic toxins**

Guillaume Blanchet<sup>1,2</sup>, Doria Alili<sup>1</sup>, Adèle Protte<sup>1</sup>, Gregory Upert<sup>1</sup>, Nicolas Gilles<sup>1</sup>, Livia Tepshi<sup>1</sup>, Enrico A. Stura<sup>1</sup>, Gilles Mourier<sup>1</sup>, and Denis Servent<sup>1\*</sup>

<sup>1</sup>CEA, Institut des Sciences du Vivant Frédéric Joliot, Service d'Ingénierie Moléculaire des Protéines (SIMOPRO), Gif-sur-Yvette, 91190, France. <sup>2</sup>UFR Sciences de la Vie, Université Pierre et Marie Curie (UPMC), 4 place Jussieu, Paris, 75005, France.

Correspondence should be addressed to D.S: [denis.servent@cea.fr](mailto:denis.servent@cea.fr)

## Table of Contents:

|                        |        |
|------------------------|--------|
| <b>Table S1</b> .....  | page 2 |
| <b>Figure S1</b> ..... | page 3 |
| <b>Figure S2</b> ..... | page 4 |
| <b>Figure S3</b> ..... | page 5 |

---

**Table S1: Statistics for AncTx1-W28R/I38S :  
Data collection, processing and refinement**

| <b>PDB code</b>                    | <b>5MG9</b>            |
|------------------------------------|------------------------|
| <b>Data Collection</b>             |                        |
| Synchrotron source                 | ESRF, Massif-1 ID30A-1 |
| Wavelength (Å)                     | 0.965                  |
| Space group                        | P3 1 21                |
| Unit-cell parameters (Å)           | 41.1 41.1 67.1         |
| Molec./asym.                       |                        |
| Resolution (Å)                     | 35.6-1.8 (1.91-1.80)   |
| R meas (%)                         | 11.2 (161.5)           |
| R factor (%)                       | 7.8 (152.4)            |
| Mean I/σ (I)                       | 13.05 (1.21)           |
| CC(1/2) (%)                        | 99.9 (75.6)            |
| Completeness (%)                   | 100 (100)              |
| Multiplicity                       | 9.34 (9.21)            |
| <b>Refinement</b>                  |                        |
| Resolution (Å)                     | 35.6-1.80 (1.91-1.80)  |
| No. of reflections                 | 11685 (1785)           |
| No. of reflections (non-anomalous) | 6410                   |
| $R_{\text{work}}$ (%)              | 20.32 (38.69)          |
| $R_{\text{free}}$ (%)              | 23.65 (41.17)          |
| <b>r.m.s. deviations</b>           |                        |
| Bond lengths (Å)                   | 0.026                  |
| Bond angles (°)                    | 7.679                  |
| <b>Ramachandran</b>                |                        |
| favoured (%)                       | 98.4                   |
| outliers (%)                       | 0                      |

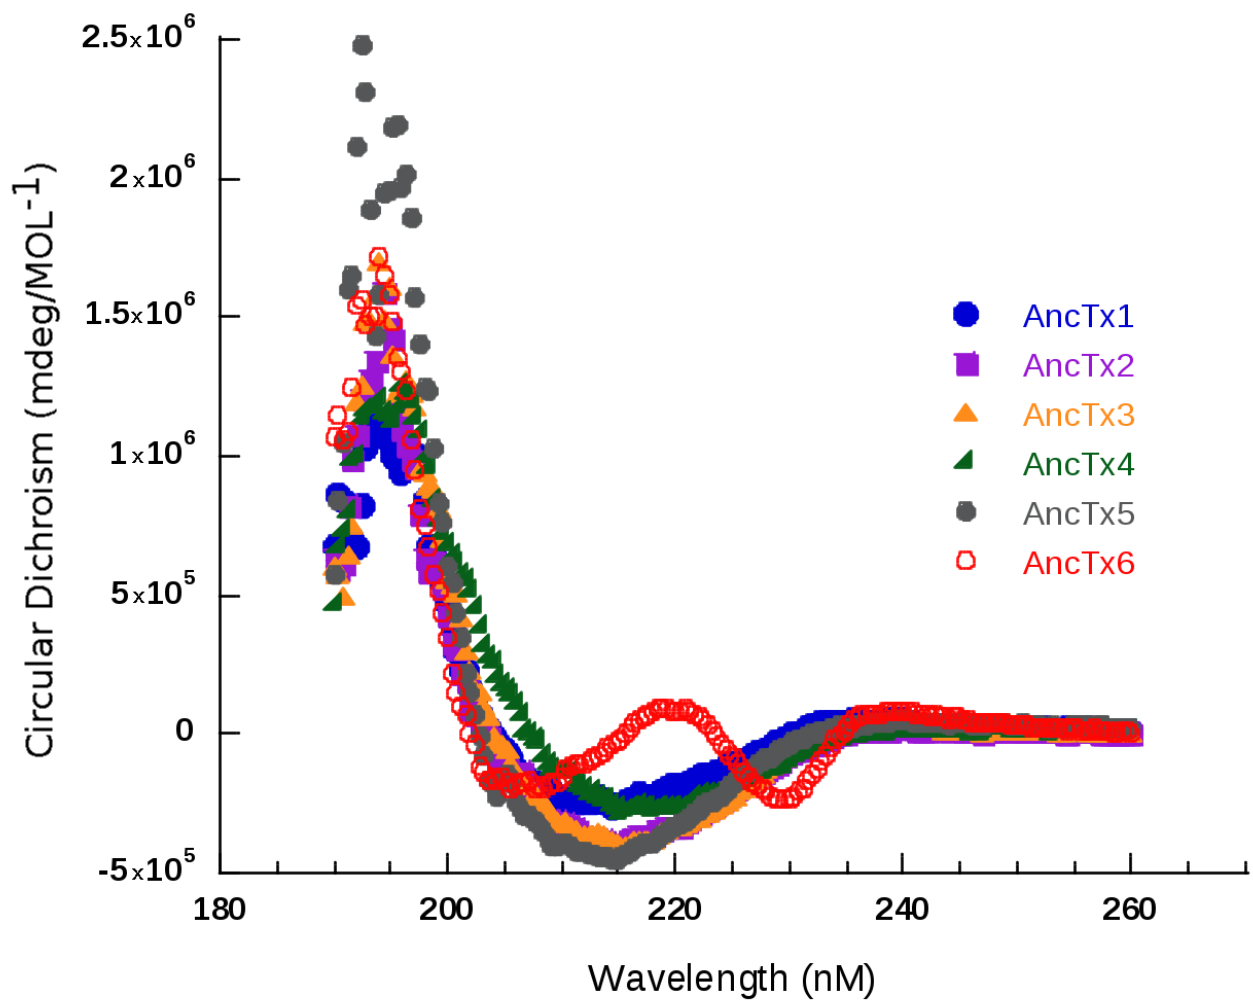

**Suppl. Fig. S1. Far-ultraviolet CD spectra of the different ancestral toxins.**  
The spectra were recorded in water at 20°C at a peptide concentration of 5 μM

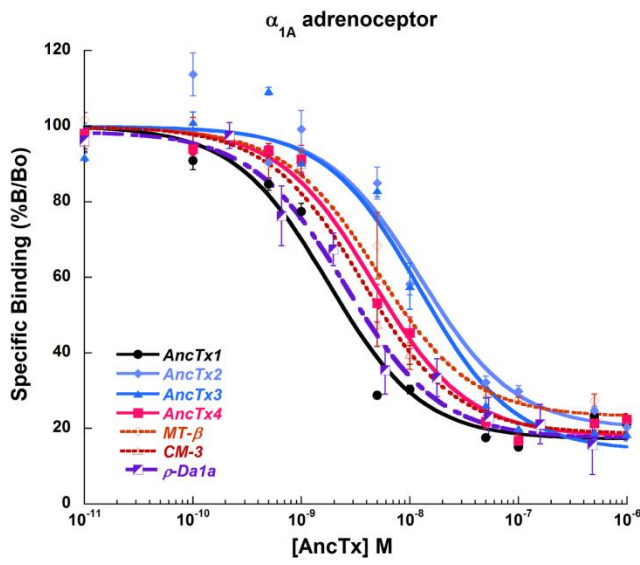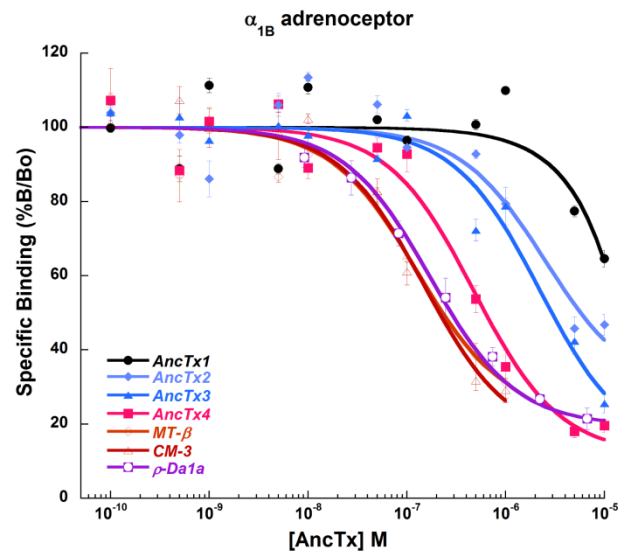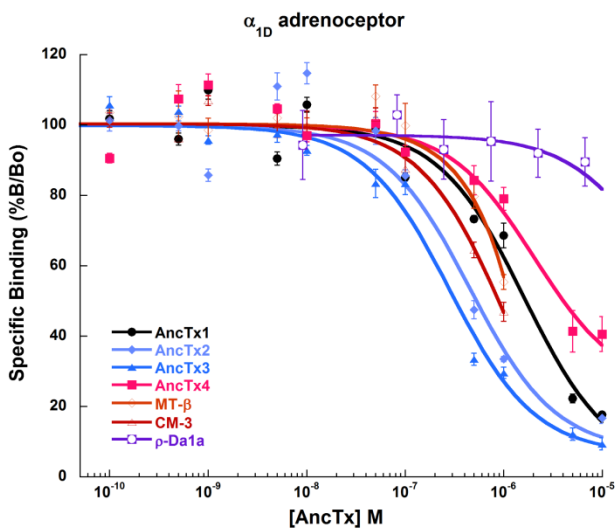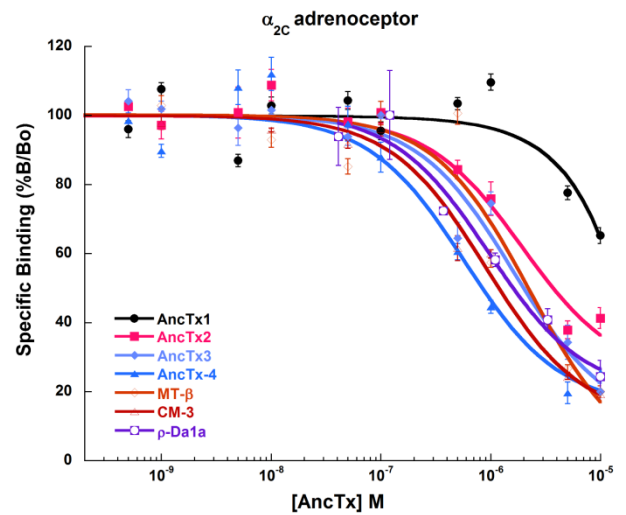

Suppl. Fig. S2. Inhibition of  $^3\text{H}$ -Prazosin binding on various  $\alpha_1$ -adrenoceptors and  $^3\text{H}$ -rauwolscine on  $\alpha_{2C}$  subtype by natural and ancestral toxins

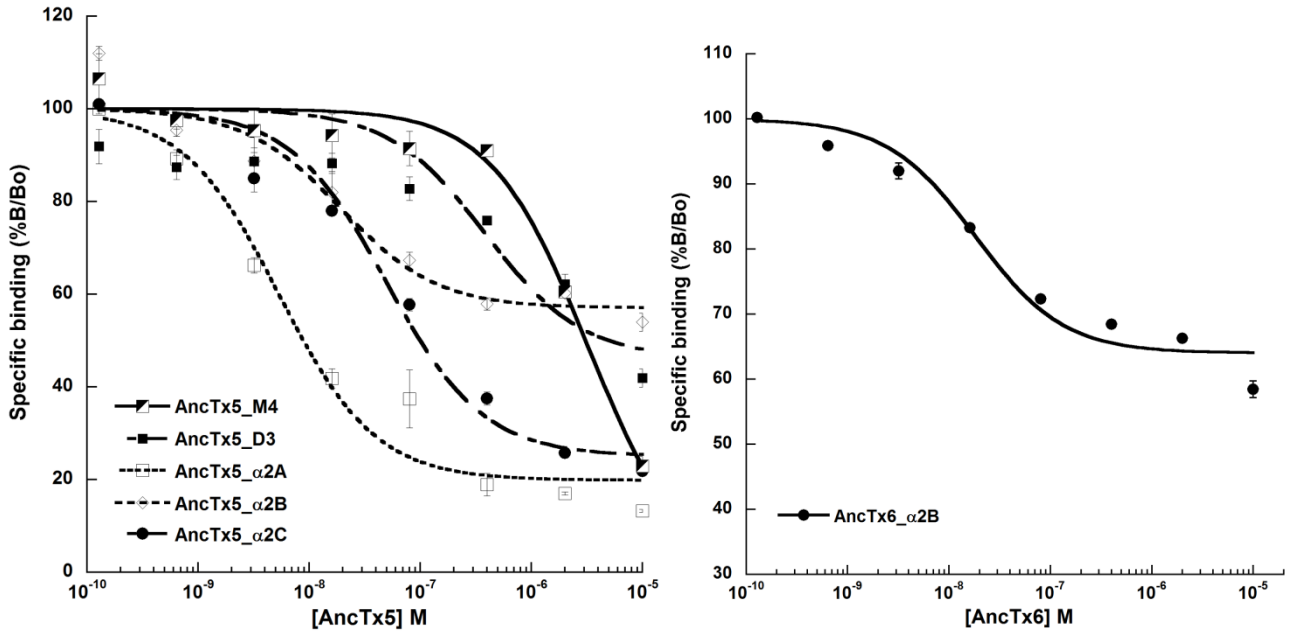

**Suppl. Fig. S3. Inhibition binding curves of AncTx5 on  $\alpha_2$ -adrenoceptors, dopamine D<sub>3</sub> and muscarinic M<sub>4</sub> receptors (left). Inhibition binding curves of AncTx6 on  $\alpha_{2B}$ -adrenoceptor (right).**
